# Supplementary material
Source: publisher figshare collection journal article supplement (https://adisjournals.figshare.com/ndownloader/files/40003531)
Supplement: Supplementary file 1 [file 40003531]

## Elacestrant: Adis Evaluation

### Key Points

- An orally available SERD being developed by Stemline Therapeutics, a subsidiary of Menarini Group, for the treatment of ER-positive, HER2-negative breast cancer
- Received its first approval on 27 January 2023 in the USA
- Approved for use in postmenopausal women or adult men with ER-positive, HER2-negative, *ESR1*-mutated (as determined by a US FDA-approved test) advanced or metastatic breast cancer with disease progression following  $\geq 1$  line of endocrine therapy

### Summary

Elacestrant (ORSERDU™) is an orally available selective estrogen receptor degrader (SERD) being developed by Stemline Therapeutics, a subsidiary of Menarini Group, for the treatment of estrogen receptor (ER)-positive, human epidermal growth factor receptor 2 (HER2)-negative breast cancer

In January 2023, elacestrant received its first approval for the treatment of postmenopausal women or adult men with ER-positive, HER2-negative, *estrogen receptor 1 (ESR1)*-mutated (as determined by a US FDA-approved test) advanced or metastatic breast cancer with disease progression following  $\geq 1$  line of endocrine therapy in the USA

A regulatory assessment of elacestrant for the treatment of ER-positive, HER2-negative advanced or metastatic breast cancer is currently underway in the EU. Development of elacestrant for the treatment of vasomotor symptoms has been discontinued.

This summary represents the opinions of the author. For a full list of declarations, including funding and author disclosure statements, and copyright information, please see the full text online. © Springer Nature Switzerland AG 2023.
